# Supplementary material for: Time Spent on Social Media and Risk of Depression in Adolescents: A Dose–Response Meta-Analysis
Source: MDPI journal article supplement (doi:10.3390/ijerph19095164), 2022-04-24
Supplement: s1 [file s1]

**Table S2. Risk of bias for included studies**

| Study                | design <sup>†</sup> | population | measurement method for social media time | measurement method for depression | control confounding | methods to deal with any design-specific issues <sup>†</sup> | statistical methods | Quality score |
|----------------------|---------------------|------------|------------------------------------------|-----------------------------------|---------------------|--------------------------------------------------------------|---------------------|---------------|
| Banjanin, 2015       | CS                  | *          | **                                       | -                                 | -                   | *                                                            | -                   | 5             |
| Boer et al. 2019     | LS                  | *          | *                                        | **                                | *                   | *                                                            | *                   | 7             |
| Brunborg, 2019       | LS                  | *          | **                                       | **                                | *                   | -                                                            | -                   | 7             |
| Calandri, 2021       | CS                  | -          | **                                       | **                                | -                   | -                                                            | *                   | 5             |
| Costa, 2020          | CS                  | *          | *                                        | *                                 | *                   | *                                                            | *                   | 6             |
| Coyne, 2019          | CS                  | *          | **                                       | **                                | *                   | *                                                            | -                   | 7             |
| Dredge, 2020         | CS                  | *          | **                                       | **                                | *                   | -                                                            | -                   | 6             |
| Ellis, 2020          | CS                  | *          | **                                       | **                                | *                   | -                                                            | -                   | 6             |
| Fardouly, 2020       | CS                  | *          | **                                       | **                                | *                   | -                                                            | -                   | 6             |
| Frison, 2016         | LS                  | *          | **                                       | **                                | *                   | *                                                            | -                   | 7             |
| Kelly, 2018          | CS                  | *          | **                                       | *_                                | *                   | -                                                            | *                   | 6             |
| Lemola, 2014         | CS                  | *          | **                                       | **                                | *                   | -                                                            | -                   | 6             |
| Ma, 2021             | LS                  | *          | **                                       | *                                 | *                   | -                                                            | *                   | 6             |
| McAllister, 2021     | CS                  | *          | **                                       | *                                 | *                   | *                                                            | *                   | 7             |
| Morin-Major, 2015    | CS                  | -          | **                                       | **                                | *                   | -                                                            | -                   | 5             |
| Padilla-Walker, 2019 | CS                  | *          | **                                       | **                                | *                   | *                                                            | -                   | 7             |
| Pantic, 2012         | CS                  | -          | **                                       | *_                                | -                   | *                                                            | -                   | 4             |
| Sela, 2020           | CS                  | -          | **                                       | **                                | *                   | *                                                            | -                   | 6             |
| Shoshani, 2021       | LS                  | *          | **                                       | **                                | -                   | -                                                            | *                   | 6             |
| Story, 2021          | CS                  | -          | *                                        | **                                | -                   | -                                                            | -                   | 3             |
| Tamura, 2017         | CS                  | -          | *_                                       | **                                | -                   | *                                                            | *                   | 5             |
| Tao, 2021            | CS                  | *          | **                                       | **                                | -                   | -                                                            | *                   | 6             |

|                    |    |   |    |    |   |   |   |   |
|--------------------|----|---|----|----|---|---|---|---|
| Thorisdottir, 2019 | CS | * | ** | ** | * | * | - | 7 |
| Twenge, 2021       | CS | * | ** | ** | * | — | * | 7 |
| Woods, 2016        | CS | * | ** | ** | * | — | — | 6 |
| Zielenski, 2021    | CS | - | *  | ** | * | — | * | 5 |

† CS, cross-sectional study; LS, longitudinal study; LC, longitudinal cohort study; ‡ appropriate methods outlined to deal with any design-specific issues including: recall bias, interviewer bias for cross-sectional studies; and biased loss to follow-up but excluding confounding for longitudinal studies; \*, 1 point; \*\*, 2 points
