# Supplementary material for: Time Spent on Social Media and Risk of Depression in Adolescents: A Dose–Response Meta-Analysis
Source: MDPI journal article supplement (doi:10.3390/ijerph19095164), 2022-04-24
Supplement: s1 [file s1]

### Meta-analysis Metatrim

|             | Pooled | 95% CI |       | Asymptotic |         | No. of  |
|-------------|--------|--------|-------|------------|---------|---------|
| Method      | Est    | Lower  | Upper | z_value    | p_value | studies |
| -----+----- |        |        |       |            |         |         |
| Fixed       | 0.539  | 0.499  | 0.579 | 26.182     | 0.000   | 30      |
| Random      | 0.468  | 0.375  | 0.562 | 9.821      | 0.000   |         |

Test for heterogeneity: Q= 103.662 on 29 degrees of freedom (p= 0.000)

Moment-based estimate of between studies variance = 0.036

Trimming estimator: Linear

Meta-analysis type: Fixed-effects model

| iteration   | estimate | Tn  | # to trim | diff |
|-------------|----------|-----|-----------|------|
| -----+----- |          |     |           |      |
| 1           | 0.539    | 133 | 0         | 465  |
| 2           | 0.539    | 133 | 0         | 0    |

Note: no trimming performed; data unchanged

Filled

Meta-analysis (exponential form)

|             | Pooled | 95% CI |       | Asymptotic |         | No. of  |
|-------------|--------|--------|-------|------------|---------|---------|
| Method      | Est    | Lower  | Upper | z_value    | p_value | studies |
| -----+----- |        |        |       |            |         |         |
| Fixed       | 1.714  | 1.647  | 1.785 | 26.182     | 0.000   | 30      |
| Random      | 1.597  | 1.455  | 1.754 | 9.821      | 0.000   |         |

Test for heterogeneity: Q= 103.662 on 29 degrees of freedom (p= 0.000)

Moment-based estimate of between studies variance = 0.036
