# Supplementary material for: Time Spent on Social Media and Risk of Depression in Adolescents: A Dose–Response Meta-Analysis
Source: Int J Environ Res Public Health. 2022 Apr 24;19(9):5164. doi: 10.3390/ijerph19095164 (PMC9103874; doi:10.3390/ijerph19095164)
Supplement: Supplementary file 1 [file ijerph-19-05164-s001.zip]

Archive with 4 entries (4 files):
- Figure S1 Sensitivity analyses for included studies.pdf
- Figure S2. Metatrim Analysis.pdf
- Table S1 PRISMA Checklist.pdf
- Table S2 Risk of bias for included studies.pdf
