# Supplementary figures and images for: Time Spent on Social Media and Risk of Depression in Adolescents: A Dose–Response Meta-Analysis
Source: MDPI journal article supplement (doi:10.3390/ijerph19095164), 2022-04-24

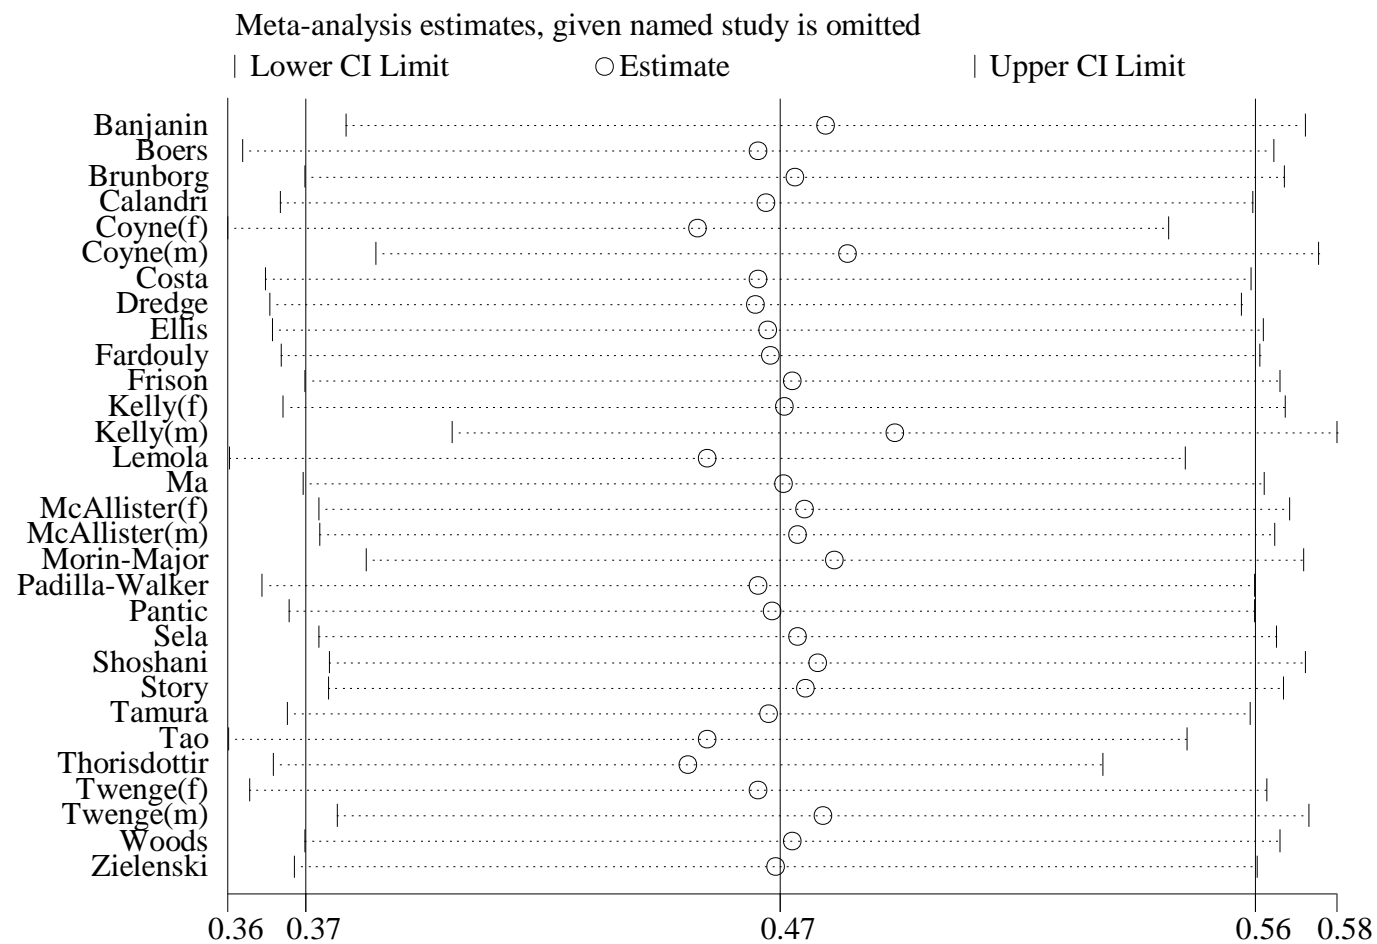

Supplement: s1 [file s1]
